# Supplementary material for: Top-down engineering of zeolite porosity
Source: Royal Society of Chemistry journal article supplement (doi:10.1039/d5cs00319a), 2025-01-01
Supplement: d5cs00319a1.zip [file d5cs00319a1.zip]

Table S2

Selected textural data reported in the literature for parent materials and their modified products. Data from sections 2, 3, 5, and 6.

| Material                                                                                         | modification                                                                                                    | $S_{\text{BET}}$<br>$\text{m}^2 \text{g}^{-1}$ | $S_{\text{micro}}$<br>$\text{m}^2 \text{g}^{-1}$ | $V_{\text{micro}}$<br>$\text{cm}^3 \text{g}^{-1}$ | $S_{\text{meso}}$<br>$\text{m}^2 \text{g}^{-1}$ | $V_{\text{meso}}$<br>$\text{cm}^3 \text{g}^{-1}$ | $V_{\text{total}}$<br>$\text{cm}^3 \text{g}^{-1}$ | Ref. |
|--------------------------------------------------------------------------------------------------|-----------------------------------------------------------------------------------------------------------------|------------------------------------------------|--------------------------------------------------|---------------------------------------------------|-------------------------------------------------|--------------------------------------------------|---------------------------------------------------|------|
| <b>Section 3.1 Production of zeolitic phases through the consumption of mesoporous materials</b> |                                                                                                                 |                                                |                                                  |                                                   |                                                 |                                                  |                                                   |      |
| MCM-41/ZSM-5                                                                                     | TPA impregnation of MCM-41                                                                                      | 822                                            |                                                  |                                                   |                                                 |                                                  |                                                   | 1    |
| UL/ZSM-5                                                                                         | TPAOH impregnation                                                                                              | 565                                            | 435                                              | 0,158                                             | 130                                             | 1.25                                             |                                                   | 2    |
| SBA-15/ZSM-5 (24h)                                                                               | TPAOH impregnation of SBA-15                                                                                    | 310                                            |                                                  | 0.024                                             |                                                 | 0.46                                             | 0.48                                              | 3    |
| SBA-15/ZSM-5                                                                                     | TPAOH impregnation+glycerol                                                                                     | 230                                            |                                                  | 0.037                                             |                                                 | 0.15                                             | 0.19                                              | 4    |
| Beta/MCM-41                                                                                      | Beta seeds addition to MCM-41 synthesis gel                                                                     | 298                                            |                                                  |                                                   |                                                 |                                                  | 1.9                                               | 5    |
| BM1a(27;0)                                                                                       | Beta seeds addition to MCM-48 synthesis gel (crystallization time of beta; crystallization time of beta+MCM-48) | 545.3                                          |                                                  | 0.018                                             | 50.8                                            | 0.067                                            |                                                   | 6    |
| BM1b(27;4)                                                                                       |                                                                                                                 | 593.8                                          |                                                  | 0.012                                             | 37.0                                            | 0.095                                            |                                                   |      |
| BM1c(27;20)                                                                                      |                                                                                                                 | 602.6                                          |                                                  | 0.009                                             | 116.9                                           | 0.143                                            |                                                   |      |
| BM2a(27;40)                                                                                      |                                                                                                                 | 679.8                                          |                                                  | 0.016                                             | 130.3                                           | 0.162                                            |                                                   |      |
| BM2b(30;40)                                                                                      |                                                                                                                 | 661.1                                          |                                                  | 0.019                                             | 124.3                                           | 0.148                                            |                                                   |      |
| BM2c(68;40)                                                                                      |                                                                                                                 | 531.8                                          |                                                  | 0.072                                             | 84.5                                            | 0.102                                            |                                                   |      |
| 10%Al-MSU-S (calc.)                                                                              | Seeds (FAU) assembly in the presence of CTMA                                                                    | 713                                            |                                                  |                                                   |                                                 |                                                  | 0.56                                              | 7    |
| 10%Al-MSU-S (steam)                                                                              |                                                                                                                 | 652                                            |                                                  |                                                   |                                                 |                                                  | 0.42                                              |      |
| Al-MSU(MFI)                                                                                      | Seeds (*BEA and MFI) assembly in the presence of CTMA                                                           | 1231                                           |                                                  |                                                   |                                                 |                                                  | 1.06                                              | 8    |
| Al-MSU(*BEA)                                                                                     |                                                                                                                 | 1124                                           |                                                  |                                                   |                                                 |                                                  | 1.06                                              |      |
| ZSM-5/MCF                                                                                        | Zeolite-coated mesocellular aluminosilicate foams                                                               | 435                                            |                                                  |                                                   |                                                 | 0.70                                             |                                                   | 9    |
| NaY-MCT                                                                                          |                                                                                                                 | 455                                            |                                                  |                                                   |                                                 | 0.55                                             |                                                   |      |
| MAS-5                                                                                            | Seeds (MFI) assembly in the presence of CTMA                                                                    | 1150                                           |                                                  |                                                   |                                                 |                                                  | 1.17                                              | 10   |
| Fch-Cat                                                                                          | Recrystallization of formed catalyst monomers                                                                   | 406                                            |                                                  | 0.09                                              |                                                 |                                                  |                                                   | 11   |
| <b>Section 3.2. Co-development of micro and mesoporous phases</b>                                |                                                                                                                 |                                                |                                                  |                                                   |                                                 |                                                  |                                                   |      |
| MZAT0.1@MSA                                                                                      | controlled desilication and self-assembly with P123                                                             | 450                                            |                                                  | 0.11                                              |                                                 | 0.31                                             | 0.42                                              | 12   |
| MZAT0.2@MSA                                                                                      |                                                                                                                 | 451                                            |                                                  | 0.08                                              |                                                 | 0.43                                             | 0.51                                              |      |

| Material                                                                                            | modification                                                                           | $S_{\text{BET}}$<br>$\text{m}^2 \text{g}^{-1}$ | $S_{\text{micro}}$<br>$\text{m}^2 \text{g}^{-1}$ | $V_{\text{micro}}$<br>$\text{cm}^3 \text{g}^{-1}$ | $S_{\text{meso}}$<br>$\text{m}^2 \text{g}^{-1}$ | $V_{\text{meso}}$<br>$\text{cm}^3 \text{g}^{-1}$ | $V_{\text{total}}$<br>$\text{cm}^3 \text{g}^{-1}$ | Ref. |
|-----------------------------------------------------------------------------------------------------|----------------------------------------------------------------------------------------|------------------------------------------------|--------------------------------------------------|---------------------------------------------------|-------------------------------------------------|--------------------------------------------------|---------------------------------------------------|------|
| Beta                                                                                                | self-assembly of zeolite nanocrystals with cationic polymer                            |                                                | 417                                              | 0.19                                              |                                                 | 0.84                                             |                                                   | 13   |
| MS-3                                                                                                | Condensation of zeolite fragments                                                      | 296                                            | 249                                              | 0.12                                              |                                                 |                                                  | 0.18                                              | 14   |
| MT-10                                                                                               |                                                                                        | 437                                            | 43                                               | 0.03                                              |                                                 |                                                  | 0.41                                              |      |
| <b>Section 3.3. Production of mesoporous phases through partial consumption of a zeolitic phase</b> |                                                                                        |                                                |                                                  |                                                   |                                                 |                                                  |                                                   |      |
| ZS-hexagonal prisms                                                                                 | ZSM-5 seed addition during SBA-15 synthesis, ZS composites with different morphologies | 648                                            |                                                  | 0.16                                              |                                                 | 0.61                                             | 0.71                                              | 15   |
| ZS-platelet                                                                                         |                                                                                        | 650                                            |                                                  | 0.16                                              |                                                 | 0.74                                             | 0.83                                              |      |
| ZS-short rod                                                                                        |                                                                                        | 660                                            |                                                  | 0.16                                              |                                                 | 0.68                                             | 0.77                                              |      |
| ZS-long rod                                                                                         |                                                                                        | 652                                            |                                                  | 0.15                                              |                                                 | 0.77                                             | 0.86                                              |      |
| ZBS-15                                                                                              | BEA seed addition to SBA-15 synthesis                                                  | 378                                            |                                                  | 0.12                                              |                                                 | 0.24                                             |                                                   | 16   |
| BM(2.0)                                                                                             | Beta desilication (1.0, 1.5, and 2.0 M NaOH) followed by MCM-41 synthesis              | 874                                            | 104                                              | 0.12                                              | 770                                             | 0.78                                             | 0.90                                              | 17   |
| BM(1.5)                                                                                             |                                                                                        | 716                                            | 114                                              | 0.20                                              | 602                                             | 0.67                                             | 0.97                                              |      |
| BM(1.0)                                                                                             |                                                                                        | 629                                            | 132                                              | 0.26                                              | 527                                             | 0.38                                             | 0.64                                              |      |
| ITQ-2/TUD-1 in situ                                                                                 | ITQ-2 to TUD-1 synt. gel                                                               | 528                                            |                                                  |                                                   |                                                 |                                                  | 1.74                                              | 18   |
| ITQ-2/TUD-1 ex situ                                                                                 | MCM-22P to TUD-1 synt. gel                                                             | 494                                            |                                                  |                                                   |                                                 |                                                  | 1.42                                              |      |
| YTUD-10                                                                                             | commercial Y (10, 20, 40, and 60 wt%) to TUD-1 synthesis gel                           | 597                                            |                                                  | 0.314                                             | 597                                             | 0.74                                             |                                                   | 19   |
| YTUD-20                                                                                             |                                                                                        | 575                                            |                                                  | 0.325                                             | 538                                             | 0.65                                             |                                                   |      |
| YTUD-40                                                                                             |                                                                                        | 654                                            |                                                  | 0.311                                             | 238                                             | 0.63                                             |                                                   |      |
| YTUD-60                                                                                             |                                                                                        | 667                                            |                                                  | 0.337                                             | 18                                              | 0.59                                             |                                                   |      |
| SBA-15/BEA                                                                                          | Zeolite addition during SBA-15 synthesis                                               | 736                                            |                                                  |                                                   | 613                                             | 0.73                                             | 1.12                                              | 20   |
| SBA-15/MOR                                                                                          |                                                                                        | 694                                            |                                                  |                                                   | 584                                             | 0.88                                             | 1.23                                              |      |
| ZM48B2                                                                                              | MFI seeds ageing during synthesis of MCM-48                                            | 1177                                           |                                                  |                                                   |                                                 |                                                  | 0.99                                              | 21   |
| ZM48B3                                                                                              |                                                                                        | 1003                                           |                                                  |                                                   |                                                 |                                                  | 0.88                                              |      |
| ZM48B4                                                                                              |                                                                                        | 840                                            | 20                                               | 0.01                                              |                                                 |                                                  | 0.78                                              |      |
| ZM48B6                                                                                              |                                                                                        | 526                                            | 139                                              | 0.06                                              |                                                 |                                                  | 0.46                                              |      |
| ZSC-6                                                                                               | Nano-ZSM-5 (precrystallization for 6, 12, 24 36 h) to SBA-15 synthesis gel             | 412                                            |                                                  |                                                   |                                                 |                                                  | 0.97                                              | 22   |
| ZSC-12                                                                                              |                                                                                        | 346                                            |                                                  |                                                   |                                                 |                                                  | 0.98                                              |      |
| ZSC-24                                                                                              |                                                                                        | 361                                            |                                                  |                                                   |                                                 |                                                  | 0.84                                              |      |
| ZSC-36                                                                                              |                                                                                        | 324                                            |                                                  |                                                   |                                                 |                                                  | 0.27                                              |      |

| Material                                                                    | modification                                                                                            | $S_{\text{BET}}$<br>$\text{m}^2 \text{g}^{-1}$ | $S_{\text{micro}}$<br>$\text{m}^2 \text{g}^{-1}$ | $V_{\text{micro}}$<br>$\text{cm}^3 \text{g}^{-1}$ | $S_{\text{meso}}$<br>$\text{m}^2 \text{g}^{-1}$ | $V_{\text{meso}}$<br>$\text{cm}^3 \text{g}^{-1}$ | $V_{\text{total}}$<br>$\text{cm}^3 \text{g}^{-1}$ | Ref. |
|-----------------------------------------------------------------------------|---------------------------------------------------------------------------------------------------------|------------------------------------------------|--------------------------------------------------|---------------------------------------------------|-------------------------------------------------|--------------------------------------------------|---------------------------------------------------|------|
| <b>Section 3.4 Reorganisation and recrystallisation of zeolitic domains</b> |                                                                                                         |                                                |                                                  |                                                   |                                                 |                                                  |                                                   |      |
| Mesosil 3d/150°C                                                            | Silicalite-1 precursor acidification, hydrothermal treatment                                            | 308                                            |                                                  | 0.014                                             |                                                 |                                                  | 1.31                                              | 23   |
| Mesosil 6d/130°C                                                            |                                                                                                         | 381                                            |                                                  | 0.005                                             |                                                 |                                                  | 1.35                                              |      |
| ZSM-5(PHAPTMS)                                                              | Zeolite silanization                                                                                    | 586                                            | 272                                              | 0.117                                             | 314                                             |                                                  |                                                   | 24   |
| Beta(PHAPTMS)                                                               |                                                                                                         | 769                                            | 694                                              | 0.287                                             | 120                                             |                                                  |                                                   |      |
| h-ZSM-5(air)                                                                | Crystallization of silanized protozeolitic units, calcination ( $\text{N}_2$ /air) impact               | 524                                            |                                                  | 0.125                                             | 323                                             |                                                  |                                                   | 25   |
| h-ZSM-5( $\text{N}_2$ /air)                                                 |                                                                                                         | 539                                            |                                                  | 0.126                                             | 336                                             |                                                  |                                                   |      |
| ZSM-5(APTMS)                                                                | Silanization of protozeolitic units by APTMS, ODTMS, IBTES, PHAPTMS                                     | 489                                            |                                                  | 0.129                                             | 191                                             |                                                  |                                                   | 26   |
| ZSM-5(ODTMS)                                                                |                                                                                                         | 426                                            |                                                  | 0.148                                             | 100                                             |                                                  |                                                   |      |
| ZSM-5(IBTES)                                                                |                                                                                                         | 518                                            |                                                  | 0.132                                             | 203                                             |                                                  |                                                   |      |
| ZSM-5(PHAPTMS)                                                              |                                                                                                         | 573                                            |                                                  | 0.158                                             | 22                                              |                                                  |                                                   |      |
| dZSM-5(1d-170°C)                                                            | Dendritic ZSM-5 by silanization of protozeolitic units by TPOAC                                         | 495                                            | 178                                              | 0.110                                             | 317                                             | 0.598                                            | 0.708                                             | 27   |
| dZSM-5(7d-170°C)                                                            |                                                                                                         | 476                                            | 236                                              | 0.147                                             | 240                                             | 0.390                                            | 0.537                                             |      |
| dZSM-5(10d-170°C)                                                           |                                                                                                         | 484                                            | 227                                              | 0.142                                             | 257                                             | 0.442                                            | 0.584                                             |      |
| dZSM-5(1d-150°C)                                                            |                                                                                                         | 630                                            | 218                                              | 0.136                                             | 412                                             | 0.809                                            | 0.945                                             |      |
| dZSM-5(7d-150°C)                                                            |                                                                                                         | 538                                            | 232                                              | 0.145                                             | 306                                             | 0.524                                            | 0.687                                             |      |
| dZSM-5(10d-150°C)                                                           |                                                                                                         | 526                                            | 226                                              | 0.141                                             | 300                                             | 0.522                                            | 0.663                                             |      |
| RT-50                                                                       | Embryonic ZSM-5 aged at RT plus hydrothermal treatments at 50, 100, 200, 400 °C                         | 521                                            |                                                  | 0.20                                              | 99                                              | 0.09                                             | 0.29                                              | 28   |
| RT-100                                                                      |                                                                                                         | 640                                            |                                                  | 0.29                                              | 28                                              | 0.02                                             | 0.31                                              |      |
| RT-200                                                                      |                                                                                                         | 740                                            |                                                  | 0.33                                              | 44                                              | 0.04                                             | 0.37                                              |      |
| RT-400                                                                      |                                                                                                         | 725                                            |                                                  | 0.33                                              | 39                                              | 0.04                                             | 0.37                                              |      |
| RT-TMA                                                                      | Embryonic zeolites prepared with OSDAs as in conventional zeolites synthesis                            | 418                                            |                                                  | 0.17                                              |                                                 |                                                  | 0.17                                              | 29   |
| RT-TPS                                                                      |                                                                                                         | 68                                             |                                                  | 0.28                                              |                                                 |                                                  | 0.30                                              |      |
| RT-TMA <sub>d</sub>                                                         |                                                                                                         | 721                                            |                                                  | 0.29                                              |                                                 |                                                  | 0.30                                              |      |
| RT-TBA                                                                      |                                                                                                         | 76                                             |                                                  | 0.30                                              |                                                 |                                                  | 0.31                                              |      |
| RT-THA                                                                      |                                                                                                         | 1095                                           |                                                  | 0.47                                              |                                                 |                                                  | 0.48                                              |      |
| ZAK-1-150°C                                                                 | Incision of the parent zeolite into unit-cell fragments by in situ generated base and bulky surfactants | 964                                            | 374                                              | 0.15                                              |                                                 |                                                  | 0.75                                              | 30   |
| ZAK-1-130°C                                                                 |                                                                                                         | 846                                            | 430                                              | 0.18                                              |                                                 |                                                  | 0.59                                              |      |
| ZAK-2                                                                       |                                                                                                         | 825                                            | 386                                              | 0.16                                              |                                                 |                                                  | 0.57                                              |      |
| ZAK-3                                                                       |                                                                                                         | 763                                            | 531                                              | 0.21                                              |                                                 |                                                  | 0.48                                              |      |

| Material                                                                  | modification                                                                                                                               | $S_{\text{BET}}$<br>$\text{m}^2 \text{g}^{-1}$ | $S_{\text{micro}}$<br>$\text{m}^2 \text{g}^{-1}$ | $V_{\text{micro}}$<br>$\text{cm}^3 \text{g}^{-1}$ | $S_{\text{meso}}$<br>$\text{m}^2 \text{g}^{-1}$ | $V_{\text{meso}}$<br>$\text{cm}^3 \text{g}^{-1}$ | $V_{\text{total}}$<br>$\text{cm}^3 \text{g}^{-1}$ | Ref. |
|---------------------------------------------------------------------------|--------------------------------------------------------------------------------------------------------------------------------------------|------------------------------------------------|--------------------------------------------------|---------------------------------------------------|-------------------------------------------------|--------------------------------------------------|---------------------------------------------------|------|
| AEI(17)-TEP<br>AEI(28)-DEDMP                                              | IZC: AEI from FAU, N,N-diethyl-2,6-dimethylpiperidinium (DEDMP) and tetraethylphosphonium (TEP) as OSDA                                    | 560<br>712                                     |                                                  | 0.21<br>0.25                                      |                                                 |                                                  |                                                   | 31   |
| SSZ-39                                                                    | IZC: FAU to SSZ-39, N,N-dimethyl-3,5-dimethylpiperidinium as OSDA                                                                          | 508                                            | 493                                              | 0.25                                              |                                                 |                                                  |                                                   | 32   |
| FAU-CHA                                                                   | IZC: FAU to SSZ-13                                                                                                                         | 800                                            | 665                                              |                                                   | 135                                             |                                                  |                                                   | 33   |
| CHA-MPD(2.7)<br>CHA-TMAda(6.3)                                            | IZC: FAU to CHA, N,N,N-trimethyl-1-adamantylammonium hydroxide and 1-(1-methylpropyl)-4-aza-1-azoniabicyclo[2.2.2]octane hydroxide as OSDA | 630<br>596                                     |                                                  | 0.28<br>0.28                                      |                                                 |                                                  | 0.48<br>0.37                                      | 34   |
| nano ZSM-5                                                                | IZC: BEA to nanoscale ZSM-5 via “OSDA-confined” strategy                                                                                   | 478.7                                          |                                                  |                                                   | 110.8                                           |                                                  | 0.51                                              | 35   |
| <b>Section 3.5 Formation of hollow zeolites</b>                           |                                                                                                                                            |                                                |                                                  |                                                   |                                                 |                                                  |                                                   |      |
| Z5_parent<br>Z5-1MNaOH<br>Z5-2MNaOH<br>Z5-4MNaOH                          | hollow zeolite crystals by desilication (NaOH)                                                                                             | 314<br>380<br>374<br>298                       |                                                  | 0.08<br>0.09<br>0.10<br>0.08                      | 139<br>177<br>132<br>122                        |                                                  | 0.25<br>0.50<br>0.88<br>1.12                      | 36   |
| Z50<br>Z50-2h                                                             | Hollow zeolite crystals by desilication (NaOH)                                                                                             | 363<br>369                                     | 333<br>301                                       | 0.16<br>0.14                                      |                                                 |                                                  | 0.29<br>0.38                                      | 37   |
| AFY1<br>AFY2                                                              | Hollow crystals by leaching with Oxalic acid+ $\text{NH}_4\text{F}$                                                                        | 671<br>740                                     |                                                  | 0.22<br>0.30                                      | 210<br>133                                      | 0.22<br>0.14                                     |                                                   | 38   |
| MRE-H                                                                     | Hollow Al-rich ZSM-48 by alumination–recrystallization                                                                                     | 303                                            |                                                  | 0.072                                             | 125                                             | 0.373                                            |                                                   | 39   |
| MSS<br>ZSM-5(1h)<br>ZSM-5(12h)<br>ZSM-5(24h)<br>ZSM-5(48h)<br>ZSM-5(168h) | Hollow ZSM-5 speres by consumption of mesoporous silica speres                                                                             | 406<br>118<br>13<br>105<br>344<br>340          | 2<br>7<br>4<br>91<br>287<br>286                  | 0<br>0.001<br>0.001<br>0.03<br>0.13<br>0.14       | 404<br>111<br>9<br>14<br>57<br>54               |                                                  | 1.02<br>0.89<br>0.07<br>0.06<br>0.22<br>0.24      | 40   |
| MSS                                                                       | Recrystallization of MSS and MCM-41                                                                                                        | 370                                            |                                                  | 0.014                                             | 320                                             |                                                  | 0.923                                             | 41   |

| Material                                      | modification                                                                                         | S <sub>BET</sub><br>m <sup>2</sup> g <sup>-1</sup> | S <sub>micro</sub><br>m <sup>2</sup> g <sup>-1</sup> | V <sub>micro</sub><br>cm <sup>3</sup> g <sup>-1</sup> | S <sub>meso</sub><br>m <sup>2</sup> g <sup>-1</sup> | V <sub>meso</sub><br>cm <sup>3</sup> g <sup>-1</sup> | V <sub>total</sub><br>cm <sup>3</sup> g <sup>-1</sup> | Ref. |
|-----------------------------------------------|------------------------------------------------------------------------------------------------------|----------------------------------------------------|------------------------------------------------------|-------------------------------------------------------|-----------------------------------------------------|------------------------------------------------------|-------------------------------------------------------|------|
| MSS@ZSM-5_7d                                  |                                                                                                      | 24                                                 |                                                      | 0.010                                                 | 14                                                  |                                                      | 0.031                                                 |      |
| MSS@ZSM-5_9d                                  |                                                                                                      | 26                                                 |                                                      | 0.004                                                 | 12                                                  |                                                      | 0.031                                                 |      |
| MSS@ZSM-5_10d                                 |                                                                                                      | 106                                                |                                                      | 0.038                                                 | 19                                                  |                                                      | 0.076                                                 |      |
| MSS@ZSM-5_11d                                 |                                                                                                      | 236                                                |                                                      | 0.093                                                 | 16                                                  |                                                      | 0.125                                                 |      |
| MSS@ZSM-5_12d                                 |                                                                                                      | 390                                                |                                                      | 0.153                                                 | 16                                                  |                                                      | 0.181                                                 |      |
| MSS@ZSM-5_13d                                 |                                                                                                      | 399                                                |                                                      | 0.155                                                 | 21                                                  |                                                      | 0.197                                                 |      |
| MSS@ZSM-5_15d                                 |                                                                                                      | 321                                                |                                                      | 0.103                                                 | 101                                                 |                                                      | 0.258                                                 |      |
| (S)MCM-4                                      |                                                                                                      | 1045                                               |                                                      | 0                                                     | 1114                                                |                                                      | 0.764                                                 |      |
| (S)MCM-41_12d                                 |                                                                                                      | 382                                                |                                                      | 0.149                                                 | 24                                                  |                                                      | 0.198                                                 |      |
| CIT-6 (parent)                                | Hollow Pt/Beta by Pt/CIT-6<br>dissolution–recrystallization                                          | 308                                                |                                                      | 0.05                                                  | 7                                                   |                                                      |                                                       | 42   |
| Pt-Beta                                       |                                                                                                      | 628                                                |                                                      | 0.24                                                  | 103                                                 |                                                      |                                                       |      |
| Section 4 Top-down mechanochemical approaches |                                                                                                      |                                                    |                                                      |                                                       |                                                     |                                                      |                                                       |      |
| ZSM-5 raw                                     | Milling and recrystallization of<br>commercial ZSM-5                                                 | 443                                                |                                                      |                                                       | 1                                                   |                                                      |                                                       | 43   |
| ZSM-5 milled                                  |                                                                                                      | 223                                                |                                                      |                                                       | 93                                                  |                                                      |                                                       |      |
| ZSM-5 recrystallised                          |                                                                                                      | 497                                                |                                                      |                                                       | 69                                                  |                                                      |                                                       |      |
| ZSM-5 (parent)                                | Milling and recrystallization of ZSM-5                                                               | 434                                                |                                                      | 0.173                                                 | 40                                                  |                                                      |                                                       | 44   |
| ZSM-5 (3kW, 3 min)                            |                                                                                                      | 438                                                |                                                      | 0.170                                                 | 64                                                  |                                                      |                                                       |      |
| ZSM-5 (3kW, 10 min)                           |                                                                                                      | 425                                                |                                                      | 0.169                                                 | 43                                                  |                                                      |                                                       |      |
| ZSM-5 (3kW, 30 min)                           |                                                                                                      | 434                                                |                                                      | 0.163                                                 | 46                                                  |                                                      |                                                       |      |
| Section 6 Other techniques                    |                                                                                                      |                                                    |                                                      |                                                       |                                                     |                                                      |                                                       |      |
| BEC                                           | Stabilization of Ge-rich zeolites via<br>postsynthesis alumination on the<br>example of ITQ-17 (BEC) | 89                                                 |                                                      | 0.002                                                 |                                                     |                                                      |                                                       | 45   |
| BEC+Al                                        |                                                                                                      | 93                                                 |                                                      | 0.003                                                 |                                                     |                                                      |                                                       |      |
| BEC+Al-HCl                                    |                                                                                                      | 239                                                |                                                      | 0.047                                                 |                                                     |                                                      |                                                       |      |
| BEC+Al-HCl-Al                                 |                                                                                                      | 251                                                |                                                      | 0.045                                                 |                                                     |                                                      |                                                       |      |
| BEC+Al-HCl-Al-HCl                             |                                                                                                      | 303                                                |                                                      | 0.064                                                 |                                                     |                                                      |                                                       |      |
| BEC+Al-HCl-Al-HCl(600C)                       |                                                                                                      | 609                                                |                                                      | 0.174                                                 |                                                     |                                                      |                                                       |      |
| ITQ-22(Si/Ge <sub>gel</sub> 10)               | Treated 2xHCl (37wt.%)                                                                               | 492                                                |                                                      | 0.185                                                 |                                                     | 0.112                                                |                                                       | 46   |
| ITQ-22(Si/Ge <sub>gel</sub> 5)                |                                                                                                      | 483                                                |                                                      | 0.18                                                  |                                                     | 0.135                                                |                                                       |      |
| ITQ-22(Si/Ge <sub>gel</sub> 3)                |                                                                                                      | 477                                                |                                                      | 0.17                                                  |                                                     | 0.148                                                |                                                       |      |
| HPM-16                                        | Repeated degermanation in alcoholic<br>acidic solution                                               | 525                                                |                                                      | 0.20                                                  |                                                     |                                                      |                                                       | 47   |

| Material                                                                                                                                                                                                                                                                                                                                                       | modification                                                                                                                                                                                                                                                                                                                             | $S_{\text{BET}}$<br>$\text{m}^2 \text{g}^{-1}$              | $S_{\text{micro}}$<br>$\text{m}^2 \text{g}^{-1}$ | $V_{\text{micro}}$<br>$\text{cm}^3 \text{g}^{-1}$                                                            | $S_{\text{meso}}$<br>$\text{m}^2 \text{g}^{-1}$ | $V_{\text{meso}}$<br>$\text{cm}^3 \text{g}^{-1}$ | $V_{\text{total}}$<br>$\text{cm}^3 \text{g}^{-1}$                                                            | Ref. |
|----------------------------------------------------------------------------------------------------------------------------------------------------------------------------------------------------------------------------------------------------------------------------------------------------------------------------------------------------------------|------------------------------------------------------------------------------------------------------------------------------------------------------------------------------------------------------------------------------------------------------------------------------------------------------------------------------------------|-------------------------------------------------------------|--------------------------------------------------|--------------------------------------------------------------------------------------------------------------|-------------------------------------------------|--------------------------------------------------|--------------------------------------------------------------------------------------------------------------|------|
| ITH-13<br>ITH-13 <sub>calc</sub> /Al<br>ITH-13 <sub>calc</sub> /HCl+TEOS/Al<br>ITH-2<br>ITH-2 <sub>calc</sub> /Al<br>ITH-2 <sub>calc</sub> /HCl+TEOS/Al<br>IWW-7<br>IWW-7 <sub>calc</sub> /Al<br>IWW-7 <sub>calc</sub> /HCl+TEOS/Al<br>IWW-3<br>IWW-3 <sub>calc</sub> /Al<br>IWW-3 <sub>calc</sub> /HCl+TEOS/Al<br>UTL-6<br>UTL-6 <sub>calc</sub> /HCl+TEOS/Al | ZEOL <sub>calc</sub> /Al - treatment of calcined zeolite with 1M Al(NO <sub>3</sub> ) <sub>3</sub> (one-step degermanation and alumination)<br>ZEOL <sub>calc</sub> /HCl+TEOS/Al - treatment of calcined zeolite with HCl/TEOS (degermanation plus Si incorporation to D4R) followed by alumination 1M Al(NO <sub>3</sub> ) <sub>3</sub> |                                                             |                                                  | 0.12<br>0.14<br>0.05<br>0.13<br>0.13<br>0.02<br>0.16<br>0.19<br>0.09<br>0.17<br>0.18<br>0.14<br>0.21<br>0.14 |                                                 |                                                  | 0.20<br>0.32<br>0.11<br>0.18<br>0.25<br>0.04<br>0.30<br>0.39<br>0.46<br>0.30<br>0.32<br>0.39<br>0.24<br>0.36 | 48   |
| UTL-4<br>SnUTL-4<br>ZrUTL-4<br>*CTH-4<br>Sn*CTH-4<br>Zr*CTH-4<br>*BEA-com<br>Sn*BEA-com<br>Zr*BEA-com                                                                                                                                                                                                                                                          | Degermanation by water treatment followed by Sn introduction by wet impregnation or Zr introduction by vapour-state ion-exchange                                                                                                                                                                                                         | 470<br>478<br>384<br>360<br>421<br>277<br>558<br>500<br>540 |                                                  | 0.20<br>0.19<br>0.16<br>0.15<br>0.16<br>0.11<br>0.18<br>0.15<br>0.16                                         |                                                 |                                                  | 0.03<br>0.11<br>0.09<br>0.05<br>0.08<br>0.05<br>0.60<br>0.49<br>0.42                                         | 49   |
| TS-1(Si/Ti=31.8)<br>M-TS-1(Si/Ti=27)<br>R-TS-1(Si/Ti=25.3)                                                                                                                                                                                                                                                                                                     | TS-1 detitanated with ethanolamine and hydrothermal treatment, R is regenerated catalyst                                                                                                                                                                                                                                                 | 307<br>310<br>310                                           | 284<br>275<br>297                                | 0.157<br>0.194<br>0.163                                                                                      | 23<br>35<br>13                                  | 0.0230<br>0.0327<br>0.0143                       |                                                                                                              | 50   |
| TS-1(Si/Ti=46)<br>TT-0.05(Si/Ti=42)<br>TT-0.1(Si/Ti=44)<br>TT-0.3(Si/Ti=42)<br>TT-0.4(Si/Ti=42)                                                                                                                                                                                                                                                                | TPAOH + hydrothermal treatment                                                                                                                                                                                                                                                                                                           | 495<br>495<br>500<br>497<br>506                             | 462<br>424<br>426<br>413<br>432                  | 0.168<br>0.174<br>0.173<br>0.172<br>0.175                                                                    | 33<br>81<br>84<br>84<br>83                      | 0.014<br>0.088<br>0.089<br>0.104<br>0.123        | 0.182<br>0.262<br>0.262<br>0.276<br>0.298                                                                    | 51   |

| Material                 | modification                                                                                                                                                           | $S_{\text{BET}}$<br>$\text{m}^2 \text{g}^{-1}$ | $S_{\text{micro}}$<br>$\text{m}^2 \text{g}^{-1}$ | $V_{\text{micro}}$<br>$\text{cm}^3 \text{g}^{-1}$ | $S_{\text{meso}}$<br>$\text{m}^2 \text{g}^{-1}$ | $V_{\text{meso}}$<br>$\text{cm}^3 \text{g}^{-1}$ | $V_{\text{total}}$<br>$\text{cm}^3 \text{g}^{-1}$ | Ref. |
|--------------------------|------------------------------------------------------------------------------------------------------------------------------------------------------------------------|------------------------------------------------|--------------------------------------------------|---------------------------------------------------|-------------------------------------------------|--------------------------------------------------|---------------------------------------------------|------|
| TT-0.5(Si/Ti=44)         |                                                                                                                                                                        | 495                                            | 442                                              | 0.170                                             | 107                                             | 0.168                                            | 0.338                                             |      |
| TS-1(Si/Ti=20.4)         | Etching at RT with $\text{NH}_4\text{F}$ -HF (1A)<br>plus treatment with NaOH & $\text{NH}_4\text{F}$ -HF (1B)                                                         | 375                                            | 258                                              | 0.12                                              | 118                                             | 0.04                                             |                                                   | 52   |
| HTS-1A(Si/Ti=23.5)       |                                                                                                                                                                        | 399                                            | 273                                              | 0.13                                              | 126                                             | 0.08                                             |                                                   |      |
| HTS-1B(22.1)             |                                                                                                                                                                        | 416                                            | 277                                              | 0.13                                              | 139                                             | 0.10                                             |                                                   |      |
| ZSM-5(Si/Al=200)         | Desilication in 0.2 M NaOH + 10 min.<br>microwave (700 W) or 2 h, 80 °C                                                                                                | 275.9                                          | 259.1                                            | 0.119                                             | 16.7                                            | 0.092                                            |                                                   | 53   |
| MZ-200-MW                |                                                                                                                                                                        | 307.3                                          | 100.4                                            | 0.041                                             | 206.9                                           | 0.316                                            |                                                   |      |
| MZ-200-TH                |                                                                                                                                                                        | 304.1                                          | 84.0                                             | 0.340                                             | 220.1                                           | 0.375                                            |                                                   |      |
| ZSM-5(Si/Al=15)          |                                                                                                                                                                        | 330.6                                          | 300.4                                            | 0.112                                             | 30.2                                            | 0.033                                            |                                                   |      |
| MZ-15-MW                 |                                                                                                                                                                        | 338.6                                          | 295.4                                            | 0.120                                             | 43.3                                            | 0.047                                            |                                                   |      |
| MZ-15-TH                 |                                                                                                                                                                        | 363.3                                          | 274.8                                            | 0.101                                             | 88.5                                            | 0.134                                            |                                                   |      |
| Parent Y                 | Combined microwave (MW)-assisted dealumination (acids: HCl, oxalic, citric, tartaric, diethylenetriaminepentaacetic, acid) followed by hydrothermal alkaline treatment | 867                                            | 858                                              | 0.3                                               | 9                                               | 0.01                                             | 0.36                                              | 54   |
| HCl-Y                    |                                                                                                                                                                        | 600                                            | 523                                              | 0.24                                              | 77                                              | 0.10                                             | 0.34                                              |      |
| OA-Y                     |                                                                                                                                                                        | 772                                            | 626                                              | 0.26                                              | 148                                             | 0.16                                             | 0.42                                              |      |
| TA-Y                     |                                                                                                                                                                        | 742                                            | 602                                              | 0.25                                              | 140                                             | 0.15                                             | 0.40                                              |      |
| CA-Y                     |                                                                                                                                                                        | 531                                            | 261                                              | 0.12                                              | 270                                             | 0.32                                             | 0.44                                              |      |
| DA-Y                     |                                                                                                                                                                        | 414                                            | 200                                              | 0.08                                              | 412                                             | 0.22                                             | 0.30                                              |      |
| Parent                   | MW-assisted dealumination (HCl, $\text{H}_4\text{EDTA}$ , $\text{Na}_4\text{EDTA}$ , $\text{Na}_4\text{EDTA}/\text{HCl}$ ) followed by desilication with 0.2 M NaOH    | 867                                            | 858                                              | 0.35                                              | 9                                               | 0.01                                             |                                                   | 55   |
| MWEA                     |                                                                                                                                                                        | 484                                            | 383                                              | 0.16                                              | 101                                             | 0.09                                             |                                                   |      |
| MWEN                     |                                                                                                                                                                        | 831                                            | 738                                              | 0.30                                              | 69                                              | 0.09                                             |                                                   |      |
| MWHCl                    |                                                                                                                                                                        | 287                                            | 164                                              | 0.07                                              | 113                                             | 0.12                                             |                                                   |      |
| MWENH                    |                                                                                                                                                                        | 474                                            | 403                                              | 0.16                                              | 93                                              | 0.04                                             |                                                   |      |
| MWEA+HT                  |                                                                                                                                                                        | 747                                            | 675                                              | 0.31                                              | 72                                              | 0.10                                             |                                                   |      |
| MWEN+HT                  |                                                                                                                                                                        | 936                                            | 822                                              | 0.32                                              | 114                                             | 0.11                                             |                                                   |      |
| MWHCl+HT                 |                                                                                                                                                                        | 340                                            | 303                                              | 0.16                                              | 37                                              | 0.03                                             |                                                   |      |
| MWENH+HT                 |                                                                                                                                                                        | 807                                            | 649                                              | 0.27                                              | 158                                             | 0.18                                             |                                                   |      |
| Y parent(3.4)            | MW-assisted dealumination by 0.2M EDTA, Si/Al in parentheses                                                                                                           | 817                                            | 873                                              | 0.32                                              | 36                                              | 0.03                                             | 0.35                                              | 56   |
| MZM-MW-1min-50°C(4.8)    |                                                                                                                                                                        | 210                                            | 31                                               | 0.01                                              | 179                                             | 0.34                                             | 0.35                                              |      |
| MZM-MW-1min-100°C(12)    |                                                                                                                                                                        | 280                                            | 19                                               | 0.01                                              | 261                                             | 0.37                                             | 0.38                                              |      |
| MZM-MW-30min-100°C(10.7) |                                                                                                                                                                        | 236                                            | 18                                               | 0.01                                              | 218                                             | 0.34                                             | 0.35                                              |      |
| MZM-HT-6h-100°C(13.0)    |                                                                                                                                                                        | 242                                            | 0                                                | 0                                                 | 242                                             | 0.40                                             | 0.40                                              |      |

| Material                                                                                                                                                                                                 | modification                                                                                                                                                | $S_{\text{BET}}$<br>$\text{m}^2 \text{g}^{-1}$ | $S_{\text{micro}}$<br>$\text{m}^2 \text{g}^{-1}$ | $V_{\text{micro}}$<br>$\text{cm}^3 \text{g}^{-1}$ | $S_{\text{meso}}$<br>$\text{m}^2 \text{g}^{-1}$ | $V_{\text{meso}}$<br>$\text{cm}^3 \text{g}^{-1}$ | $V_{\text{total}}$<br>$\text{cm}^3 \text{g}^{-1}$ | Ref. |
|----------------------------------------------------------------------------------------------------------------------------------------------------------------------------------------------------------|-------------------------------------------------------------------------------------------------------------------------------------------------------------|------------------------------------------------|--------------------------------------------------|---------------------------------------------------|-------------------------------------------------|--------------------------------------------------|---------------------------------------------------|------|
| Fe/USY/im<br>Fe/USY/s<br>FeY/im<br>FeY/s<br>Fe/MFI/15/im<br>Fe/MFI/15/s<br>Fe/MFI/37/im<br>Fe/MFI/37/s                                                                                                   | Zeolites iron-exchanged by impregnation (im) and sonication (s, 20 min, 60 W, 20 kHz)                                                                       | 374                                            |                                                  | 0.126                                             |                                                 |                                                  | 0.273                                             | 57   |
|                                                                                                                                                                                                          |                                                                                                                                                             | 311                                            |                                                  | 0.085                                             |                                                 |                                                  | 0.236                                             |      |
|                                                                                                                                                                                                          |                                                                                                                                                             | 274                                            |                                                  | 0.083                                             |                                                 |                                                  | 0.229                                             |      |
|                                                                                                                                                                                                          |                                                                                                                                                             | 448                                            |                                                  | 0.160                                             |                                                 |                                                  | 0.323                                             |      |
|                                                                                                                                                                                                          |                                                                                                                                                             | 307                                            |                                                  | 0.111                                             |                                                 |                                                  | 0.270                                             |      |
|                                                                                                                                                                                                          |                                                                                                                                                             | 291                                            |                                                  | 0.108                                             |                                                 |                                                  | 0.259                                             |      |
|                                                                                                                                                                                                          |                                                                                                                                                             | 231                                            |                                                  | 0.096                                             |                                                 |                                                  | 0.255                                             |      |
|                                                                                                                                                                                                          |                                                                                                                                                             | 337                                            |                                                  | 0.103                                             |                                                 |                                                  | 0.236                                             |      |
| NaBEA(12.5)<br>NaBEA(37.5)<br>CuBEA(12.5)ex<br>CuBEA(12.5)s<br>CuBEA(37.5)ex<br>CuBEA(37.5)s<br>CoBEA(12.5)ex<br>CoBEA(12.5)s<br>CoBEA(37.5)ex<br>CoBEA(37.5)s<br>FeBEA(37.5)ex<br>FeBEA(37.5)s          | Zeolites Cu,Co,Fe-exchanged by ion exchange or sonication (sonication energy 65.8 to 67.8 J), Si/Al in parentheses                                          | 762                                            |                                                  | 0.14                                              |                                                 |                                                  | 0.36                                              | 58   |
|                                                                                                                                                                                                          |                                                                                                                                                             | 868                                            |                                                  | 0.21                                              |                                                 |                                                  | 0.65                                              |      |
|                                                                                                                                                                                                          |                                                                                                                                                             | 730                                            |                                                  | 0.17                                              |                                                 |                                                  | 0.60                                              |      |
|                                                                                                                                                                                                          |                                                                                                                                                             | 744                                            |                                                  | 0.15                                              |                                                 |                                                  | 0.52                                              |      |
|                                                                                                                                                                                                          |                                                                                                                                                             | 711                                            |                                                  | 0.15                                              |                                                 |                                                  | 0.53                                              |      |
|                                                                                                                                                                                                          |                                                                                                                                                             | 737                                            |                                                  | 0.14                                              |                                                 |                                                  | 0.46                                              |      |
|                                                                                                                                                                                                          |                                                                                                                                                             | 432                                            |                                                  | 0.09                                              |                                                 |                                                  | 0.25                                              |      |
|                                                                                                                                                                                                          |                                                                                                                                                             | 533                                            |                                                  | 0.11                                              |                                                 |                                                  | 0.30                                              |      |
|                                                                                                                                                                                                          |                                                                                                                                                             | 440                                            |                                                  | 0.12                                              |                                                 |                                                  | 0.28                                              |      |
|                                                                                                                                                                                                          |                                                                                                                                                             | 542                                            |                                                  | 0.15                                              |                                                 |                                                  | 0.34                                              |      |
|                                                                                                                                                                                                          |                                                                                                                                                             | 743                                            |                                                  | 0.16                                              |                                                 |                                                  | 0.47                                              |      |
|                                                                                                                                                                                                          |                                                                                                                                                             | 759                                            |                                                  | 0.16                                              |                                                 |                                                  | 0.44                                              |      |
| Parent Y(2.60)<br>EAY-0.1-30min-S(3.88)<br>EAY-0.1-30min-HT(3.88)<br>EAY-0.1-1h-S(4.05)<br>EAY-0.1-1h-HT(4.39)<br>EAY-0.1-3h-S(3.98)<br>EAY-0.1-3h-HT(3.86)<br>EAY-0.1-6h-S(3.86)<br>EAY-0.1-6h-HT(4.25) | Y zeolite dealuminated with citric acid and H <sub>4</sub> EDTA followed with NaOH desilication – sonication in 0.2 M NaOH (50–60 Hz). Si/Al in parentheses | 867                                            | 858                                              | 0.35                                              | 0.01                                            | 9                                                | 0.36                                              | 59   |
|                                                                                                                                                                                                          |                                                                                                                                                             | 804                                            | 722                                              | 0.33                                              | 0.12                                            | 82                                               | 0.45                                              |      |
|                                                                                                                                                                                                          |                                                                                                                                                             | 818                                            | 757                                              | 0.34                                              | 0.09                                            | 61                                               | 0.43                                              |      |
|                                                                                                                                                                                                          |                                                                                                                                                             | 773                                            | 713                                              | 0.33                                              | 0.10                                            | 60                                               | 0.41                                              |      |
|                                                                                                                                                                                                          |                                                                                                                                                             | 818                                            | 759                                              | 0.34                                              | 0.09                                            | 59                                               | 0.43                                              |      |
|                                                                                                                                                                                                          |                                                                                                                                                             | 769                                            | 706                                              | 0.32                                              | 0.10                                            | 63                                               | 0.42                                              |      |
|                                                                                                                                                                                                          |                                                                                                                                                             | 770                                            | 711                                              | 0.32                                              | 0.09                                            | 59                                               | 0.41                                              |      |
|                                                                                                                                                                                                          |                                                                                                                                                             | 969                                            | 568                                              | 0.25                                              | 0.19                                            | 128                                              | 0.45                                              |      |
|                                                                                                                                                                                                          |                                                                                                                                                             | 681                                            | 521                                              | 0.23                                              | 0.22                                            | 160                                              | 0.46                                              |      |



| Material                                                                                                                             | modification                                                                                                                                                        | $S_{\text{BET}}$<br>$\text{m}^2 \text{g}^{-1}$ | $S_{\text{micro}}$<br>$\text{m}^2 \text{g}^{-1}$ | $V_{\text{micro}}$<br>$\text{cm}^3 \text{g}^{-1}$ | $S_{\text{meso}}$<br>$\text{m}^2 \text{g}^{-1}$ | $V_{\text{meso}}$<br>$\text{cm}^3 \text{g}^{-1}$ | $V_{\text{total}}$<br>$\text{cm}^3 \text{g}^{-1}$ | Ref. |
|--------------------------------------------------------------------------------------------------------------------------------------|---------------------------------------------------------------------------------------------------------------------------------------------------------------------|------------------------------------------------|--------------------------------------------------|---------------------------------------------------|-------------------------------------------------|--------------------------------------------------|---------------------------------------------------|------|
| BEC-parent(2.9)<br>Ti-BEC-plasma(3.5)<br>Si-BEC-plasma(4.2)<br>Ti,Si-BEC-plasma(4.2)<br>Ti-BEC-calcined<br>Si-BEC-calcined           | low-temperature $\text{SiCl}_4$ and $\text{TiCl}_4$ plasma treatment of as-synthesized Ge-silicate (BEC);<br>discharge plasma, 50 Hz sinusoidal power supply (2 kV) | 64<br>373<br>417<br>411<br>263<br>279          |                                                  | 0.004<br>0.145<br>0.150<br>0.150<br>0.122<br>0.11 |                                                 |                                                  |                                                   | 60   |
| SSZ-13                                                                                                                               | Ultrafast recrystallisation                                                                                                                                         | 685                                            |                                                  | 0.24                                              |                                                 |                                                  |                                                   | 61   |
| MOR                                                                                                                                  | Pure nano-MOR from milled, recrystallized natural zeolite: MOR - main phase, clinoptilolite (HEU) - impurities                                                      | 240                                            |                                                  | 0.04                                              |                                                 | 0.36                                             | 0.40                                              | 62   |
| Parent ZSM-5(30.0)<br>M(29.7)<br>MR(30.5)<br>$\text{MR}_{\text{CTAB } 0.004}$ (30.6)<br>$\text{MR}_{\text{CTAB } 0.012}$ (29.9)      | Milled (M) and recrystallized (R) nano-ZSM-5, Si/Al in parentheses                                                                                                  | 300<br>177<br>331<br>381<br>377                |                                                  | 0.14<br>0.04<br>0.13<br>0.12<br>0.13              | 20<br>97<br>38<br>98<br>110                     |                                                  |                                                   | 63   |
| Silicalite-1<br>G5min<br>G5min+HT1h<br>G5min+HT15h                                                                                   | solvent-free mechanochemical treatment (grinding - H) in $\text{NH}_4\text{F}$ and TPABr followed by hydrothermal treatment (HT)                                    | 434<br>412<br>403<br>399                       |                                                  | 0.18<br>0.19<br>0.21<br>0.18                      | 28.0<br>21.0<br>32.5<br>30.0                    | 0.04<br>0.03<br>0.01<br>0.03                     |                                                   | 64   |
| Solid ZSM-5( $\text{N}_2$ )<br>Hollow ZSM-5( $\text{N}_2$ )<br>Solid ZSM-5(Ar)<br>Hollow ZSM-5(Ar)<br>Hollow, double shell ZSM-5(Ar) | Hollow nanozeolites by dissolution–recrystallization in TPAOH, porosity determined by $\text{N}_2$ and Ar adsorption                                                | 507<br>443<br>539<br>522<br>403                | 336<br>338<br>418<br>445<br>246                  | 0.15<br>0.15<br>0.18<br>0.18<br>0.10              | 171<br>105<br>121<br>77<br>157                  |                                                  | 0.49<br>0.74<br>0.66<br>0.75<br>0.51              | 65   |

#### References to Table S2

1. M. J. Verhoef, P. J. Kooyman, J. C. Van Der Waal, M. S. Rigutto, J. A. Peters and H. Van Bekkum, *Chemistry of Materials*, 2001, **13**, 683-687.
2. D. Trong On and S. Kaliaguine, *Angewandte Chemie International Edition*, 2001, **40**, 3248-3251.

3. A. A. Campos, C. R. Silva, M. Wallau, L. D. Dimitrov and E. A. Urquieta-González, in *Studies in Surface Science and Catalysis*, eds. J. Čejka, N. Žilková and P. Nachtigall, Elsevier, 2005, vol. 158, pp. 573-580.
4. A. A. Campos, C. R. Silva, L. D. Dimitrov, M. Wallau and E. A. Urquieta-Gonzalez, in *Studies in Surface Science and Catalysis*, eds. E. M. Gaigneaux, M. Devillers, D. E. De Vos, S. Hermans, P. A. Jacobs, J. A. Martens and P. Ruiz, Elsevier, 2006, vol. 162, pp. 347-354.
5. P. Prokesova, S. Mintova, J. Čejka and T. Bein, *Materials Science & Engineering C-Biomimetic and Supramolecular Systems*, 2003, **23**, 1001-1005.
6. P. Prokešová-Fojtíková, S. Mintova, J. Čejka, N. Žilková and A. Zúkal, *Microporous and Mesoporous Materials*, 2006, **92**, 154-160.
7. Y. Liu, W. Z. Zhang and T. J. Pinnavaia, *Journal of the American Chemical Society*, 2000, **122**, 8791-8792.
8. Y. Liu, W. Z. Zhang and T. J. Pinnavaia, *Angewandte Chemie-International Edition*, 2001, **40**, 1255-1258.
9. D. Trong On and S. Kaliaguine, *Journal of the American Chemical Society*, 2003, **125**, 618-619.
10. Z. Zhang, Y. Han, F.-S. Xiao, S. Qiu, L. Zhu, R. Wang, Y. Yu, Z. Zhang, B. Zou, Y. Wang, H. Sun, D. Zhao and Y. Wei, *Journal of the American Chemical Society*, 2001, **123**, 5014-5021.
11. J. Zhou, J. Teng, L. Ren, Y. Wang, Z. Liu, W. Liu, W. Yang and Z. Xie, *Journal of Catalysis*, 2016, **340**, 166-176.
12. D. Wang, L. Xu and P. Wu, *J. Mater. Chem. A*, 2014, **2**, 15535-15545.
13. J. Song, L. Ren, C. Yin, Y. Ji, Z. Wu, J. Li and F.-S. Xiao, *The Journal of Physical Chemistry C*, 2008, **112**, 8609-8613.
14. F. N. Gu, F. Wei, J. Y. Yang, N. Lin, W. G. Lin, Y. Wang and J. H. Zhu, *Chemistry of Materials*, 2010, **22**, 2442-2450.
15. Y. Lv, X. Wang, D. Gao, X. Ma, S. Li, Y. Wang, G. Song, A. Duan and G. Chen, *Industrial & Engineering Chemistry Research*, 2018, **57**, 14031-14043.
16. V. S. P. Ganjala, C. K. P. Neeli, C. V. Pramod, M. Khagga, K. S. R. Rao and D. R. Burri, *Catalysis Communications*, 2014, **49**, 82-86.
17. L. Gao, Z. Shi, U. J. Etim, P. Wu, D. Han, W. Xing, S. Mintova, P. Bai and Z. Yan, *Microporous and Mesoporous Materials*, 2019, **277**, 17-28.
18. C. C. Aquino, H. O. Pastore, A. F. Masters and T. Maschmeyer, *ChemCatChem*, 2011, **3**, 1759-1762.
19. M. S. Hamdy and G. Mul, *ChemCatChem*, 2013, **5**, 3156-3163.
20. K. Jaroszewska, M. Fedyna and J. Trawczyński, *Applied Catalysis B: Environmental*, 2019, **255**, 117756.
21. Y. Xia and R. Mokaya, *Journal of Materials Chemistry*, 2004, **14**, 863.
22. X. H. Vu, U. Bentrup, M. Hunger, R. Kraehnert, U. Armbruster and A. Martin, *Journal of Materials Science*, 2014, **49**, 5676-5689.
23. W. Stevens, V. Meynen, E. Bruijn, O. Lebedev, G. Van Tendeloo, P. Cool and E. Vansant, *Microporous and Mesoporous Materials*, 2008, **110**, 77-85.
24. D. P. Serrano, J. Aguado, J. M. Escola, J. M. Rodriguez and A. Peral, *Chemistry of Materials*, 2006, **18**, 2462-2464.
25. D. P. Serrano, R. A. Garcia, M. Linares and B. Gil, *Catalysis Today*, 2012, **179**, 91-101.
26. D. P. Serrano, J. Aguado, J. M. Escola, J. M. Rodriguez and A. Peral, *Journal of Materials Chemistry*, 2008, **18**, 4210.
27. M. del Mar Alonso-Doncel, C. Ochoa-Hernández, G. Gómez-Pozuelo, A. Oliveira, J. González-Aguilar, Á. Peral, R. Sanz and D. P. Serrano, *Journal of Energy Chemistry*, 2023, **80**, 77-88.
28. K.-G. Haw, J.-M. Goupil, J.-P. Gilson, N. Nesterenko, D. Minoux, J.-P. Dath and V. Valtchev, *New Journal of Chemistry*, 2016, **40**, 4307-4313.

29. M. Akouche, J.-P. Gilson, N. Nesterenko, S. Moldovan, D. Chateigner, H. E. Siblani, D. Minoux, J.-P. Dath and V. Valtchev, *Chemistry of Materials*, 2020, **32**, 2123-2132.
30. R. Kumar Parsapur, A. M. Hengne, G. Melinte, O. Refa Koseoglu, R. P. Hodgkins, A. Bendjeriou-Sedjerari, Z. Lai and K. W. Huang, *Angewandte Chemie International Edition*, 2024, **63**, e2023, 14217.
31. T. Sonoda, T. Maruo, Y. Yamasaki, N. Tsunoji, Y. Takamitsu, M. Sadakane and T. Sano, *Journal of Materials Chemistry A*, 2015, **3**, 857-865.
32. N. Martín, C. R. Boruntea, M. Moliner and A. Corma, *Chemical Communications*, 2015, **51**, 11030-11033.
33. X. Peng, L. Chen, L. You, Y. Jin, C. Zhang, S. Ren, F. Kapteijn, X. Wang and X. Gu, *Angewandte Chemie International Edition*, 2024, **63**, e202405969.
34. Z. Wu, H. Sun, Q. Deng, L. Han, P. Lv, H. Chen, H. Duan and K. Zhu, *ChemCatChem*, 2024, **16**, e202401010.
35. L. Xu, Y. Yuan, Q. Han, L. Dong, L. Chen, X. Zhang and L. Xu, *Catalysis Science & Technology*, 2020, **10**, 7904-7913.
36. T. Li, Z. Ma, F. Krumeich, A. J. Knorpp, A. B. Pinar and J. A. Van Bokhoven, *ChemNanoMat*, 2018, **4**, 992-999.
37. D. Fodor, F. Krumeich, R. Hauert and J. A. Van Bokhoven, *Chemistry – A European Journal*, 2015, **21**, 6272-6277.
38. Y. Shen, M. Xu, J. Li, Z. Qin, C. Wang, S. Mintova and X. Liu, *Inorganic Chemistry Frontiers*, 2021, **8**, 2144-2152.
39. W. Liu, J. Li, Q. Yu, H. Chen, W. Liu, Z. Yang, X. Liu, Z. Xu, S. Xu, X. Zhu and X. Li, *ACS Applied Materials & Interfaces*, 2022, **14**, 52025-52034.
40. Z. Wang, Y. Liu, J.-g. Jiang, M. He and P. Wu, *Journal of Materials Chemistry*, 2010, **20**, 10193-10199.
41. M. Rutkowska, W. Dubiel, A. Kowalczyk, A. Jankowska, Z. Piwowarska, K. Maćkosz, J. Kawatko, B. Gil and L. Chmielarz, *Journal of Physics and Chemistry of Solids*, 2025, **201**, 112645.
42. A. R. Morgado Prates, C. Pagis, F. C. Meunier, L. Burel, T. Epicier, L. Roiban, S. Koneti, N. Bats, D. Farrusseng and A. Tuel, *Crystal Growth & Design*, 2018, **18**, 592-596.
43. T. Wakihara, A. Ihara, S. Inagaki, J. Tatami, K. Sato, K. Komeya, T. Meguro, Y. Kubota and A. Nakahira, *Crystal Growth & Design*, 2011, **11**, 5153-5158.
44. S. Inagaki, K. Sato, S. Hayashi, J. Tatami, Y. Kubota and T. Wakihara, *ACS Applied Materials & Interfaces*, 2015, **7**, 4488-4493.
45. F. Gao, M. Jaber, K. Bozhilov, A. Vicente, C. Fernandez and V. Valtchev, *Journal of the American Chemical Society*, 2009, **131**, 16580-16586.
46. L. Burel, N. Kasian and A. Tuel, *Angewandte Chemie International Edition*, 2014, **53**, 1360-1363.
47. Z. R. Gao, S. R. G. Balestra, J. Li and M. A. Camblor, *Angewandte Chemie International Edition*, 2021, **60**, 20249-20252.
48. M. V. Shamzhy, P. Eliašová, D. Vitvarová, M. V. Opanasenko, D. S. Firth and R. E. Morris, *Chemistry – A European Journal*, 2016, **22**, 17377-17386.
49. J. Zhang, T. Zakeri, Q. Yue, M. Kubů, R. Barakov, J. Přech, M. Opanasenko and M. Shamzhy, *Catalysis Today*, 2024, **440**, 114825.
50. Y. Xue, Y. Xie, H. Wei, Y. Wen, X. Wang and B. Li, *New Journal of Chemistry*, 2014, **38**, 4229.
51. Y. Jiao, A.-L. Adedigba, Q. He, P. Miedziak, G. Brett, N. F. Dummer, M. Perdjón, J. Liu and G. J. Hutchings, *Catalysis Science & Technology*, 2018, **8**, 2211-2217.
52. S. Du, X. Chen, Q. Sun, N. Wang, M. Jia, V. Valtchev and J. Yu, *Chemical Communications*, 2016, **52**, 3580-3583.
53. Q. G. Ho, L. T. Bui, P. T. T. Nguyen, D. T. H. Ngo and L. Q. Nguyen, *Chemical Engineering Transactions*, 2023, **106**, 907-912.

54. R. Zhang, D. Raja, Y. Zhang, Y. Yan, A. A. Garforth, Y. Jiao and X. Fan, *Topics in Catalysis*, 2020, **63**, 340-350.
55. R. Zhang, R. Zou, W. Li, Y. Chang and X. Fan, *Microporous and Mesoporous Materials*, 2022, **333**, 111736.
56. S. Abdulridha, Y. Jiao, S. Xu, R. Zhang, A. A. Garforth and X. Fan, *Frontiers in Chemistry*, 2020, **8**, 482.
57. D. Chlebda, P. Stachurska, R. Jędrzejczyk, Ł. Kuterasiński, A. Dziedzicka, S. Górecka, L. Chmielarz, J. Łojewska, M. Sitarz and P. Jodłowski, *Nanomaterials*, 2018, **8**, 21.
58. N. Sobuś, B. Michorczyk, M. Piotrowski, Ł. Kuterasiński, D. K. Chlebda, J. Łojewska, R. J. Jędrzejczyk, P. Jodłowski, P. Kuśtrowski and I. Czekaj, *Catalysis Letters*, 2019, **149**, 3349-3360.
59. R. Zhang, P. Zhong, H. Arandiyana, Y. Guan, J. Liu, N. Wang, Y. Jiao and X. Fan, *Frontiers of Chemical Science and Engineering*, 2020, **14**, 275-287.
60. M. El-Roz, L. Lakiss, A. Vicente, K. N. Bozhilov, F. Thibault-Starzyk and V. Valtchev, *Chem. Sci.*, 2014, **5**, 68-80.
61. Z. Liu, N. Nomura, D. Nishioka, Y. Hotta, T. Matsuo, K. Oshima, Y. Yanaba, T. Yoshikawa, K. Ohara, S. Kohara, T. Takewaki, T. Okubo and T. Wakihara, *Chemical Communications*, 2015, **51**, 12567-12570.
62. T. Kurniawan, O. Muraza, A. S. Hakeem and A. M. Al-Amer, *Crystal Growth & Design*, 2017, **17**, 3313-3320.
63. G. T. M. Kadja, T. R. Suprianti, M. M. Ilmi, M. Khalil, R. R. Mukti and Subagjo, *Microporous and Mesoporous Materials*, 2020, **308**, 110550.
64. J. Huang, Y. Fan, G. Zhang and Y. Ma, *RSC Advances*, 2020, **10**, 13583-13590.
65. C. Dai, A. Zhang, M. Liu, X. Guo and C. Song, *Advanced Functional Materials*, 2015, **25**, 7479-7487.
