# Supplementary material for: Top-down engineering of zeolite porosity
Source: Royal Society of Chemistry journal article supplement (doi:10.1039/d5cs00319a), 2025-01-01
Supplement: d5cs00319a1.zip [file d5cs00319a1.zip]

**Table S1**

Selected textural data reported in the literature for parent materials and their modified products. Data from section 1.

| zeolite             | Si/Al | modification                                                           | Size of pores | S <sub>BET</sub><br>m <sup>2</sup> g <sup>-1</sup> | S <sub>micro</sub><br>m <sup>2</sup> g <sup>-1</sup> | V <sub>micro</sub><br>cm <sup>3</sup> g <sup>-1</sup> | S <sub>meso</sub><br>cm <sup>3</sup> g <sup>-1</sup> | V <sub>meso</sub><br>cm <sup>3</sup> g <sup>-1</sup> | Ref. |
|---------------------|-------|------------------------------------------------------------------------|---------------|----------------------------------------------------|------------------------------------------------------|-------------------------------------------------------|------------------------------------------------------|------------------------------------------------------|------|
| ERI parent          | 3.5   |                                                                        | 8-MR          | 594                                                | 575                                                  | 0.22                                                  | 19                                                   | 0.08                                                 | 1    |
| ERI hierarchical    |       | dealumination with HNO <sub>3</sub> followed by desilication with NaOH |               | 590                                                | 441                                                  | 0.19                                                  | 149                                                  | 0.24                                                 |      |
| SSZ-13 parent       | 11.2  |                                                                        |               | 558.1                                              |                                                      | 0.23                                                  | 50.7                                                 | 0.14                                                 | 2    |
| SSZ-13 hierarchical |       | desilication with NaOH                                                 |               | 512.6                                              |                                                      | 0.13                                                  | 118.7                                                | 0.57                                                 |      |
| SSZ-13 parent       | 40    |                                                                        |               | 695                                                | 0.28                                                 |                                                       | 35                                                   |                                                      | 3    |
| SSZ-13 hierarchical |       | partial detemplation @250°C followed by desilication with NaOH         |               | 742                                                | 0.23                                                 |                                                       | 110                                                  |                                                      |      |
| SSZ-13 parent       | 14    |                                                                        |               | 704                                                | 679                                                  | 0.25                                                  | 25                                                   | 0.06                                                 | 4    |
| SSZ-13 hierarchical |       | desilication with NaOH                                                 |               | 623                                                | 541                                                  | 0.21                                                  | 82                                                   | 0.13                                                 |      |
| SSZ-13 hierarchical |       |                                                                        |               | 545                                                | 463                                                  | 0.17                                                  | 122                                                  | 0.24                                                 |      |
| ZSM-58 parent       | 48    |                                                                        |               | 358                                                |                                                      | 0.20                                                  |                                                      | 0.02                                                 | 5    |
| ZSM-58 hierarchical |       | desilication with NaOH                                                 |               | 388                                                |                                                      | 0.11                                                  |                                                      | 0.50                                                 |      |
| ZSM-5 parent        | 19    |                                                                        | 10-MR         | 400                                                |                                                      | 0.15                                                  | 10                                                   | 0.03                                                 | 6    |
| ZSM-5 hierarchical  |       | desilication with NaOH                                                 |               | 425                                                |                                                      | 0.14                                                  | 80                                                   | 0.10                                                 |      |
| ZSM-5 parent        | 37    |                                                                        |               | 430                                                |                                                      | 0.17                                                  | 40                                                   | 0.09                                                 |      |
| ZSM-5 hierarchical  |       | desilication with NaOH                                                 |               | 510                                                |                                                      | 0.13                                                  | 235                                                  | 0.48                                                 |      |
| ZSM-5 parent        | 31.6  |                                                                        |               |                                                    |                                                      | 0.105                                                 | 59                                                   | 0.068                                                | 7    |
| ZSM-5 hierarchical  |       | desilication with NaOH and TBAOH                                       |               |                                                    |                                                      | 0.127                                                 | 124                                                  | 0.225                                                |      |
| ZSM-5 parent        | 32    |                                                                        |               | 377                                                |                                                      | 0.17                                                  | 40                                                   |                                                      | 8    |
| ZSM-5 hierarchical  |       | desilication with NaOH followed by acid treatment                      |               | 501                                                |                                                      | 0.15                                                  | 144                                                  |                                                      |      |
| ZSM-5 parent        | 140   |                                                                        |               |                                                    |                                                      | 0.104                                                 | 140                                                  | 0.082                                                | 9    |

| zeolite            | Si/Al | modification                                                                           | Size of pores | $S_{\text{BET}}$<br>$\text{m}^2 \text{g}^{-1}$ | $S_{\text{micro}}$<br>$\text{m}^2 \text{g}^{-1}$ | $V_{\text{micro}}$<br>$\text{cm}^3 \text{g}^{-1}$ | $S_{\text{meso}}$<br>$\text{cm}^3 \text{g}^{-1}$ | $V_{\text{meso}}$<br>$\text{cm}^3 \text{g}^{-1}$ | Ref. |
|--------------------|-------|----------------------------------------------------------------------------------------|---------------|------------------------------------------------|--------------------------------------------------|---------------------------------------------------|--------------------------------------------------|--------------------------------------------------|------|
| ZSM-5 hierarchical |       | desilication with NaOH and TBAOH solution                                              |               |                                                |                                                  | 0.099                                             | 181                                              | 0.169                                            | 6    |
| ZSM-5 parent       | 1038  |                                                                                        |               | 390                                            |                                                  |                                                   | 15                                               | 0.03                                             |      |
| ZSM-5 hierarchical |       | desilication with NaOH                                                                 |               | 460                                            |                                                  | 0.15                                              | 80                                               | 0.15                                             |      |
| TNU-9 parent       | 14.6  |                                                                                        |               | 362                                            | 342                                              | 0.17                                              | 20                                               | 0.03                                             | 10   |
| TNU-9 hierarchical |       | desilication with NaOH                                                                 |               | 450                                            | 347                                              | 0.17                                              | 103                                              | 0.11                                             | 11   |
| TNU-9 parent       | 20.2  |                                                                                        |               | 418                                            |                                                  | 0.167                                             |                                                  |                                                  |      |
| TNU-9 hierarchical |       | desilication with NaOH                                                                 |               | 474                                            |                                                  | 0.133                                             |                                                  | 0.34                                             | 10   |
| IM-5 parent        | 11.9  |                                                                                        |               | 315                                            | 305                                              | 0.15                                              | 10                                               | 0.02                                             |      |
| IM-5 hierarchical  |       | desilication with NaOH                                                                 |               | 367                                            | 287                                              | 0.14                                              | 80                                               | 0.08                                             |      |
| Beta parent        | 22    |                                                                                        | 12-MR         | 567                                            | 523                                              | 0.18                                              | 44                                               | 0.06                                             | 12   |
| Beta hierarchical  |       | desilication with NaOH and TBAOH solution                                              |               | 793                                            | 325                                              | 0.14                                              | 468                                              | 0.35                                             |      |
| Y parent           | 31    |                                                                                        |               |                                                |                                                  | 0.33                                              | 280                                              | 0.20                                             | 13   |
| Y hierarchical     |       | desilication with NaOH and TBAOH solution                                              |               |                                                |                                                  | 0.27                                              | 540                                              | 1.15                                             |      |
| L parent           | 3     |                                                                                        |               | 405                                            | 347                                              | 0.14                                              | 58                                               | 0.08                                             | 14   |
| L hierarchical     |       | dealumination with $\text{HNO}_3$ solution followed by desilication with NaOH solution |               | 511                                            | 377                                              | 0.16                                              | 134                                              | 0.21                                             |      |
| MOR parent         | 7.5   |                                                                                        | 12-MR&8-MR    | 405                                            | 388                                              | 0.19                                              | 17                                               | 0.03                                             | 15   |
| MOR hierarchical   |       | desilication with NaOH and TBAOH solution                                              |               | 510                                            | 439                                              | 0.20                                              | 71                                               | 0.15                                             |      |
| MOR parent         | 21    |                                                                                        |               |                                                |                                                  |                                                   | 8                                                | 0.21                                             | 16   |
| MOR hierarchical   |       | desilication with NaOH                                                                 |               |                                                |                                                  |                                                   | 90                                               | 0.19                                             |      |
| MOR parent         | 27    |                                                                                        |               |                                                |                                                  |                                                   | 5                                                | 0.21                                             |      |
| MOR hierarchical   |       | desilication with NaOH                                                                 |               |                                                |                                                  |                                                   | 115                                              | 0.19                                             |      |
| FER parent         | 9     |                                                                                        |               | 280                                            | 270                                              | 0.13                                              | 10                                               | 0.09                                             | 17   |

| zeolite          | Si/Al | modification                                                                             | Size of pores | S <sub>BET</sub><br>m <sup>2</sup> g <sup>-1</sup> | S <sub>micro</sub><br>m <sup>2</sup> g <sup>-1</sup> | V <sub>micro</sub><br>cm <sup>3</sup> g <sup>-1</sup> | S <sub>meso</sub><br>cm <sup>3</sup> g <sup>-1</sup> | V <sub>meso</sub><br>cm <sup>3</sup> g <sup>-1</sup> | Ref. |
|------------------|-------|------------------------------------------------------------------------------------------|---------------|----------------------------------------------------|------------------------------------------------------|-------------------------------------------------------|------------------------------------------------------|------------------------------------------------------|------|
| FER hierarchical |       | dealumination with HNO <sub>3</sub> solution followed by desilication with LiOH solution | 10-MR & 8-MR  | 305                                                | 219                                                  | 0.24                                                  | 86                                                   | 0.11                                                 |      |
| FER parent       | 23    |                                                                                          |               | 295                                                | 281                                                  | 0.13                                                  | 14                                                   | 0.13                                                 |      |
| FER hierarchical |       | dealumination with HNO <sub>3</sub> solution followed by desilication with LiOH solution |               | 326                                                | 218                                                  | 0.12                                                  | 108                                                  | 0.12                                                 |      |
| FER parent       | 27    |                                                                                          |               | 369                                                |                                                      | 0.14                                                  | 20                                                   |                                                      | 18   |
| FER hierarchical |       | desilication with NaOH                                                                   |               | 304                                                |                                                      | 0.08                                                  | 107                                                  |                                                      |      |

#### References to Table S1

1. J. Tekla, L. Lakiss, V. Valchev, K. A. Tarach, M. Jabłońska, V. Girman, A. Szymocha, A. Kowalczyk, K. Góra-Marek and J.-P. Gilson, *Microporous and Mesoporous Materials*, 2020, **299**, 110088.
2. T. Zhang, F. Qiu and J. Li, *Applied Catalysis B: Environmental*, 2016, **195**, 48-58.
3. M. K. Wardani, G. T. M. Kadja, A. T. N. Fajar, Subagjo, I. G. B. N. Makertihartha, M. L. Gunawan, V. Suendo and R. R. Mukti, *RSC Advances*, 2019, **9**, 77-86.
4. L. Sommer, D. Mores, S. Svelle, M. Stöcker, B. M. Weckhuysen and U. Olsbye, *Microporous and Mesoporous Materials*, 2010, **132**, 384-394.
5. C. Selzer, T. Biemelt, A. Werner and S. Kaskel, *Microporous and Mesoporous Materials*, 2018, **261**, 51-57.
6. J. C. Groen, L. A. A. Pfeffer, J. A. Moulijn and J. Pérez-Ramírez, *Chemistry – A European Journal*, 2005, **11**, 4983-4994.
7. K. Sadowska, K. Góra-Marek and J. Datka, *Vibrational Spectroscopy*, 2012, **63**, 418-425.
8. K. A. Tarach, K. Pyra and K. Góra-Marek, *Molecules*, 2020, **25**, 2878.
9. K. Sadowska, K. Góra-Marek, M. Drozdek, P. Kustrowski, J. Datka, J. Martinez Triguero and F. Rey, *Microporous and Mesoporous Materials*, 2013, **168**, 195-205.
10. K. A. Tarach, J. Martinez-Triguero, S. Valencia, K. Wojciechowska, F. Rey and K. Góra-Marek, *Applied Catalysis B: Environmental*, 2023, **338**, 123066.
11. M. Kubů, N. Žilková and J. Čejka, *Catalysis Today*, 2011, **168**, 63-70.
12. K. Tarach, K. Góra-Marek, J. Tekla, K. Brylewska, J. Datka, K. Mlekodaj, W. Makowski, M. C. Igualada Lopez, J. Martinez Triguero and F. Rey, *Journal of Catalysis*, 2014, **312**, 46-57.

13. M. Gackowski, K. Tarach, Ł. Kuterasiński, J. Podobiński, B. Sulikowski and J. Datka, *Microporous and Mesoporous Materials*, 2019, **281**, 134-141.
14. K. A. Tarach, J. Tekla, U. Filek, A. Szymocha, I. Tarach and K. Gora-Marek, *Microporous and Mesoporous Materials*, 2017, **241**, 132-144.
15. K. Gora-Marek, K. Tarach, J. Tekla, Z. Olejniczak, P. Kustrowski, L. Liu, J. Martinez-Triguero and F. Rey, *Journal of Physical Chemistry C*, 2014, **118**, 28043-28054.
16. J. C. Groen, T. Sano, J. A. Moulijn and J. Pérez-Ramírez, *Journal of Catalysis*, 2007, **251**, 21-27.
17. K. Brylewska, K. A. Tarach, W. Mozgawa, Z. Olejniczak, U. Filek and K. Gora-Marek, *Journal of Molecular Structure*, 2016, **1126**, 147-153.
18. A. Bonilla, D. Baudouin and J. Pérez-Ramírez, *Journal of Catalysis*, 2009, **265**, 170-180.
