# Supplementary material for: Top-down engineering of zeolite porosity
Source: Royal Society of Chemistry journal article supplement (doi:10.1039/d5cs00319a), 2025-01-01
Supplement: d5cs00319a1.zip [file d5cs00319a1.zip]

**Table S3.**

Selected textural and acid site concentrations data reported in the literature for MWW zeolites and their modified products.

| MWW material | Treatment details        | Si/Al       | Surface area, m <sup>2</sup> g <sup>-1</sup> |                   | Pore volume, cm <sup>3</sup> g <sup>-1</sup> |                    |                   | Acid site concentration at 150 C°, mmol g <sup>-1</sup> |         |                   | Ref. |
|--------------|--------------------------|-------------|----------------------------------------------|-------------------|----------------------------------------------|--------------------|-------------------|---------------------------------------------------------|---------|-------------------|------|
|              |                          |             | S <sub>BET</sub>                             | S <sub>meso</sub> | V <sub>total</sub>                           | V <sub>micro</sub> | V <sub>meso</sub> | BAS                                                     | LAS     | Large base        |      |
| MCM-22       |                          | 50 (gel)    | 453                                          | 111               |                                              |                    |                   | 0.057                                                   | 0.023   | 2.3*              | 1    |
| MCM-56       |                          | 12(gel)     | 400                                          | 156               |                                              |                    |                   | 0.064                                                   | 0.077   | 3.0*              |      |
| ITQ-2        |                          |             | 840                                          | 790               |                                              |                    |                   | 0.021                                                   | 0.023   | 3.7*<br>*relative |      |
| MCM-22       |                          | 30 (gel 50) | 416                                          |                   |                                              |                    |                   |                                                         |         |                   | 2    |
|              | Sonication time, minutes |             |                                              |                   |                                              |                    |                   |                                                         |         |                   |      |
| ITQ-2        | 15                       | 10.8        | 832                                          | 785               |                                              |                    |                   |                                                         |         |                   |      |
|              | 90                       |             | 840                                          | 796               |                                              |                    |                   |                                                         |         |                   |      |
|              | 120                      |             | 985                                          | 960               |                                              |                    |                   |                                                         |         |                   |      |
|              | 600                      |             | 1010                                         | 1010              | (mesoporous MCM-41)                          |                    |                   |                                                         |         |                   |      |
| MCM-22       |                          | 19.8        | 442                                          |                   |                                              |                    |                   |                                                         |         |                   |      |
| ITQ-2        | 15                       | 9.5         | 452                                          | 91                |                                              |                    |                   |                                                         |         |                   |      |
|              | 90                       |             | 560                                          | 98                |                                              |                    |                   |                                                         |         |                   |      |
|              | 120                      |             | 580                                          | 121               |                                              |                    |                   |                                                         |         |                   |      |
|              | 600                      |             | 630                                          | 280               |                                              |                    |                   |                                                         |         |                   |      |
|              | 1200                     |             | 760                                          | 600               |                                              |                    |                   |                                                         |         |                   |      |
| MCM-22       |                          | 12          | 378                                          | 294               | 0.16                                         | 0.10               | 0.06              |                                                         |         |                   | 3    |
| ITQ-2        |                          | 12          | 639                                          | 237               | 0.51                                         | 0.10               | 0.41              |                                                         | @100 °C |                   |      |
| MCM-22       |                          | 19          | 469                                          | 352               | 0.28                                         | 0.16               | 0.12              | 0.264                                                   | 0.160   |                   |      |
| ITQ-2        |                          | 19          | 704                                          | 153               | 0.63                                         | 0.07               | 0.56              | 0.118                                                   | 0.158   |                   |      |
| MCM-22       |                          | 23          | 401                                          | 318               | 0.22                                         | 0.14               | 0.08              |                                                         |         |                   |      |
| ITQ-2        |                          | 24          | 859                                          | 202               | 0.66                                         | 0.08               | 0.58              |                                                         |         |                   |      |
| MCM-22       |                          | 29          | 340                                          | 256               | 0.21                                         | 0.12               | 0.09              |                                                         |         |                   |      |

| MWW material                                | Treatment details    | Si/Al | Surface area, $\text{m}^2 \text{g}^{-1}$ |                   | Pore volume, $\text{cm}^3 \text{g}^{-1}$ |                    |                   | Acid site concentration at 150 C°, $\text{mmol g}^{-1}$ |       |            | Ref. |
|---------------------------------------------|----------------------|-------|------------------------------------------|-------------------|------------------------------------------|--------------------|-------------------|---------------------------------------------------------|-------|------------|------|
|                                             |                      |       | $S_{\text{BET}}$                         | $S_{\text{meso}}$ | $V_{\text{total}}$                       | $V_{\text{micro}}$ | $V_{\text{meso}}$ | BAS                                                     | LAS   | Large base |      |
| ITQ-2                                       |                      | 30    | 827                                      | 221               | 0.76                                     | 0.09               | 0.67              |                                                         |       |            |      |
| MCM-22                                      |                      | 46    | 396                                      | 311               | 0.18                                     | 0.11               | 0.07              |                                                         |       |            |      |
| ITQ-2                                       |                      | 48    | 689                                      | 322               | 0.47                                     | 0.05               | 0.42              |                                                         |       |            |      |
| Syntheses of MCM-22 with added % surfactant |                      |       |                                          |                   |                                          |                    |                   |                                                         |       |            | 4    |
| MCM-22                                      |                      | 15    | 634                                      | 149               |                                          | 0.19               |                   |                                                         |       |            |      |
|                                             | 7% surfactant        |       | 592                                      | 348               |                                          | 0.11               |                   |                                                         |       |            |      |
|                                             | 8% surfactant        |       | 557                                      | 359               |                                          | 0.09               |                   |                                                         |       |            |      |
| MCM-22                                      |                      | 30    | 626                                      | 109               |                                          | 0.21               |                   |                                                         |       |            |      |
|                                             | 7% surfactant        |       | 370                                      | 228               |                                          | 0.06               |                   |                                                         |       |            |      |
|                                             | 8% surfactant        |       | 327                                      | 229               |                                          | 0.04               |                   |                                                         |       |            |      |
| MCM-22                                      |                      | 45    | 565                                      | 76                |                                          | 0.19               |                   |                                                         |       |            |      |
| ITQ-2                                       |                      | 15    | 662                                      | 519               |                                          | 0.07               |                   |                                                         |       |            |      |
| ITQ-2                                       |                      | 45    | 612                                      | 506               |                                          | 0.06               |                   |                                                         |       |            | 5    |
|                                             |                      |       |                                          |                   |                                          |                    |                   |                                                         |       | DTBP       |      |
| MCM-22                                      |                      |       | 495                                      | 145               | 0.99                                     | 0.17               | 0.15              | 0.294                                                   | 0.123 | 0.081      |      |
| MCM-56                                      |                      |       | 437                                      | 162               | 1.01                                     | 0.13               | 0.16              | 0.230                                                   | 0.220 | 0.080      |      |
| DS-ITQ-2                                    |                      |       | 545                                      | 304               | 2.06                                     | 0.12               | 0.41              | 0.183                                                   | 0.181 | 0.147      |      |
| ITQ-2                                       |                      |       | 745                                      | 574               | 1.04                                     | 0.08               | 0.38              | 0.189                                                   | 0.177 | 0.195      | 6    |
| MCM-56                                      |                      | 10    | 457                                      | 180               |                                          | 0.09               |                   | 1.155                                                   | 0.099 |            |      |
| MCM-56                                      | exfoliated, isolated |       |                                          |                   |                                          |                    |                   |                                                         |       |            |      |
|                                             |                      | 8     | 502                                      | 220               |                                          | 0.071              |                   | 0.649                                                   | 0.259 |            |      |
| MCM-56                                      |                      | 11    | 467                                      | 167               |                                          | 0.092              |                   | 0.778                                                   | 0.097 |            |      |
| MCM-56                                      | exfoliated, isolated |       |                                          |                   |                                          |                    |                   |                                                         |       |            |      |
|                                             |                      | 9     | 633                                      | 309               |                                          | 0.105              |                   | 0.557                                                   | 0.244 |            | 7    |
| MCM-56                                      |                      | 11    | 514                                      | 225               |                                          | 0.087              | 0.04              | 0.669                                                   | 0.148 |            |      |

| MWW material                                                           | Treatment details              | Si/Al | Surface area, m <sup>2</sup> g <sup>-1</sup> |                   | Pore volume, cm <sup>3</sup> g <sup>-1</sup> |                    |                   | Acid site concentration at 150 C°, mmol g <sup>-1</sup> |       |            | Ref. |
|------------------------------------------------------------------------|--------------------------------|-------|----------------------------------------------|-------------------|----------------------------------------------|--------------------|-------------------|---------------------------------------------------------|-------|------------|------|
|                                                                        |                                |       | S <sub>BET</sub>                             | S <sub>meso</sub> | V <sub>total</sub>                           | V <sub>micro</sub> | V <sub>meso</sub> | BAS                                                     | LAS   | Large base |      |
| MCM-56                                                                 | exfoliated, dialyzed, isolated |       |                                              |                   |                                              |                    |                   |                                                         |       |            |      |
|                                                                        |                                |       | 566                                          | 171               |                                              | 0.108              | 0.08              | 0.598                                                   | 0.18  |            |      |
| MCM-22                                                                 |                                | 13.5  | 536                                          |                   | 0.475                                        | 0.174              |                   | 0.78                                                    | 0.18  | 0.04       | 8    |
| MCM-22                                                                 | swell. calc.                   | 15.8  | 460                                          |                   | 0.396                                        | 0.144              |                   | 0.50                                                    | 0.24  | 0.01       |      |
| MCM-36                                                                 |                                | 28.7  | 729                                          |                   | 0.74                                         | 0.056              |                   | 0.38                                                    | 0.09  | 0.07       |      |
| MCM-36                                                                 |                                | 32.5  | 578                                          |                   | 0.444                                        | 0.047              |                   | 0.29                                                    | 0.1   | 0.02       |      |
| MCM-36                                                                 |                                | 23.6  | 614                                          |                   | 0.552                                        | 0.038              |                   | 0.44                                                    | 0.129 | 0.02       |      |
| MCM-56 CEC                                                             |                                | 50    | 283                                          | 166               | 0.66                                         | 0.061              |                   | 0.078                                                   | 0.125 | 0.034      |      |
| Swollen with HDTMA-Cl – tetramethylammonium hydroxide (TMAOH) mixtures |                                |       |                                              |                   |                                              |                    |                   |                                                         |       |            |      |
| MCM-36                                                                 | 4 TMA                          | 36    | 678                                          | 644               | 0.57                                         | 0.019              |                   | 0.199                                                   | 0.129 | 0.055      |      |
| MCM-36                                                                 | 2 TMA                          |       | 661                                          | 619               | 0.45                                         | 0.021              |                   |                                                         |       |            |      |
| MCM-36                                                                 | 1 TMA                          | 35    | 633                                          | 594               | 0.54                                         | 0.024              |                   | 0.105                                                   | 0.176 | 0.058      |      |
| MCM-36                                                                 | HDTMA-OH                       | 67    | 725                                          | 616               | 0.70                                         | 0.061              |                   | 0.091                                                   | 0.077 | 0.051      |      |
| MCM-22                                                                 |                                | 25    |                                              |                   |                                              |                    |                   | 0.263                                                   | 0.189 | 0.035      |      |
| MCM-36                                                                 | 4 TMA                          | 60    | 593                                          | 457               | 0.51                                         | 0.072              |                   | 0.146                                                   | 0.065 | 0.026      |      |
| MCM-36                                                                 | 2 TMA                          | 47    | 595                                          | 416               | 0.44                                         | 0.097              |                   | 0.126                                                   | 0.109 | 0.063      |      |
| MCM-22(A)                                                              |                                | 50    | 478                                          | 55                | 0.364                                        |                    |                   | 0.269                                                   | 0.072 | 0.004      | 10   |
| MCM-36(A)                                                              |                                |       | 535                                          | 115               | 0.33                                         |                    |                   | 0.197                                                   | 0.176 | 0.016      |      |
| MCM-22(B)                                                              |                                | 50    | 484                                          | 33                | 0.309                                        |                    |                   | 0.187                                                   | 0.052 | 0.035      |      |
| MCM-36(B)                                                              |                                |       | 697                                          | 162               | 0.564                                        |                    |                   | 0.135                                                   | 0.182 | 0.145      |      |
| MCM-49                                                                 |                                | 12    | 490                                          |                   |                                              |                    |                   | 1.282                                                   | 0.141 | 0.068      | 11   |
| MCM-22                                                                 |                                | 10    | 542                                          |                   |                                              |                    |                   | 1.515                                                   | 0.119 | 0.112      |      |
| MCM-22                                                                 |                                | 21    | 418                                          |                   |                                              |                    |                   | 0.758                                                   | 0.055 | 0.068      |      |
| MCM-22                                                                 |                                | 29    | 481                                          |                   |                                              |                    |                   | 0.556                                                   | 0.042 | 0.087      |      |
| MCM-22                                                                 |                                | 40    | 329                                          |                   |                                              |                    |                   | 0.407                                                   | 0.032 | 0.087      |      |

| MWW material | Treatment details | Si/Al | Surface area, m <sup>2</sup> g <sup>-1</sup> |                   | Pore volume, cm <sup>3</sup> g <sup>-1</sup> |                    |                   | Acid site concentration at 150 C°, mmol g <sup>-1</sup> |       |            | Ref. |
|--------------|-------------------|-------|----------------------------------------------|-------------------|----------------------------------------------|--------------------|-------------------|---------------------------------------------------------|-------|------------|------|
|              |                   |       | S <sub>BET</sub>                             | S <sub>meso</sub> | V <sub>total</sub>                           | V <sub>micro</sub> | V <sub>meso</sub> | BAS                                                     | LAS   | Large base |      |
| MCM-36       | swell RT          | 54    | 789                                          |                   |                                              |                    |                   | 0.056                                                   | 0.019 |            | 12   |
| MCM-36       | swell HT          | 24    | 862                                          |                   |                                              |                    |                   | 0.062                                                   | 0.061 |            |      |
| MCM-36       | swell RT          | 23    | 742                                          |                   |                                              |                    |                   | 0.108                                                   | 0.040 |            |      |

#### References to Table S3

1. A. Corma, U. Diaz, V. Fornés, J. M. Guil, J. Martínez-Triguero and E. J. Croyghton, *Journal of Catalysis*, 2000, **191**, 218-224.
2. P. Frontera, F. Testa, R. Aiello, S. Candamano and J. B. Nagy, *Microporous and Mesoporous Materials*, 2007, **106**, 107-114.
3. J. Wang, X. Tu, W. Hua, Y. Yue and Z. Gao, *Microporous and Mesoporous Materials*, 2011, **142**, 82-90.
4. Y. Zhou, Y. Mu, M.-F. Hsieh, B. Kabius, C. Pacheco, C. Bator, R. M. Rioux and J. D. Rimer, *Journal of the American Chemical Society*, 2020, **142**, 8211-8222.
5. V. J. Margarit, M. E. Martinez-Armero, M. T. Navarro, C. Martinez and A. Corma, *Angewandte Chemie-International Edition*, 2015, **54**, 13724-13728.
6. W. J. Roth, T. Sasaki, K. Wolski, Y. Song, D. M. Tang, Y. Ebina, R. Z. Ma, J. Grzybek, K. Kalahurska, B. Gil, M. Mazur, S. Zapotoczny and J. Cejka, *Science Advances*, 2020, **6**, Article number eaay8163.
7. K. Kalahurska, P. P. Ziemianski, W. J. Roth and B. Gil, *Molecules*, 2021, **26**, 2076.
8. P. Chlubna, W. J. Roth, A. Zukał, M. Kubu and J. Pavlatova, *Catal. Today*, 2012, **179**, 35-42.
9. W. J. Roth, P. Chlubná, M. Kubů and D. Vitvarová, *Catal. Today*, 2013, **204**, 8-14.
10. B. Gil, B. Marszałek, A. Micek-Ilnicka and Z. Olejniczak, *Top. Catal.*, 2010, **53**, 1340-1348.
11. S. Laforge, P. Ayrault, D. Manin and M. Guisnet, *Appl. Catal., A*, 2005, **279**, 79-88.
12. S. Maheshwari, C. Martínez, M. Teresa Portilla, F. J. Llopis, A. Corma and M. Tsapatsis, *Journal of Catalysis*, 2010, **272**, 298-308.
